# Supplementary material for: Validity of a multi-context sitting questionnaire across demographically diverse population groups: AusDiab3
Source: PubMed Central journal article supplement (PMC4670496; doi:10.1186/s12966-015-0309-y), 2015-12-04
Supplement: 12966_2015_309_MOESM3_ESM.pdf [file 12966_2015_309_MOESM3_ESM.pdf]

### Additional File 3

**Table:** Comparison of baseline (AusDiab1) characteristics between AusDiab1 participants who ultimately were included (n=700) or not included (n=10547) in the present study, due to sub-study non-selection/non-participation/lack of data, or loss to follow-up (AusDiab1–AusDiab3).

| Baseline (AusDiab1) characteristic                                | Excluded participants | Included participants | p for difference |
|-------------------------------------------------------------------|-----------------------|-----------------------|------------------|
| Participant numbers                                               | 10547                 | 700                   |                  |
| Age in years, mean (SD)                                           | 51.85 (14.65)         | 46.71 (10.28)         | p<0.001          |
| Male                                                              | 4736 (44.9%)          | 312 (44.6%)           | p=0.88           |
| Lives in capital city                                             | 6473 (61.4%)          | 438 (62.6%)           | p=0.55           |
| Married or defacto relationship                                   | 8001 (75.9%)          | 568 (81.1%)           | p<0.01           |
| Post-high school qualification                                    | 6092 (57.8%)          | 491 (70.1%)           | p<0.001          |
| Working full- or part-time                                        | 6000 (56.9%)          | 543 (77.6%)           | p=0.47           |
| Income <AU\$800/week                                              | 5869 (55.6%)          | 277 (39.6%)           | p<0.001          |
| Country of birth Australia                                        | 7975 (75.6%)          | 571 (81.6%)           | p<0.01           |
| BMI category of normal ( $\geq 18.5$ – $< 25$ kg/m <sup>2</sup> ) | 3865 (36.7%)          | 294 (42.0%)           | p<0.001          |
| Reports $\geq 150$ mins/week LTPA                                 | 5386 (51.1%)          | 410 (48.6%)           | p<0.01           |

Data are n (%) except where indicated. Missing data on baseline characteristics for the excluded participants for marital status (n=6), qualifications (n=21), income (n=92), country of birth (n=2) and BMI (n=174); and included participants for income (n=2) and BMI (n=6). Data are not weighted.
