# Supplementary material for: Validity of a multi-context sitting questionnaire across demographically diverse population groups: AusDiab3
Source: PubMed Central journal article supplement (PMC4670496; doi:10.1186/s12966-015-0309-y), 2015-12-04
Supplement: 12966_2015_309_MOESM4_ESM.pdf [file 12966_2015_309_MOESM4_ESM.pdf]

#### Additional File 4

**Table:** Sitting time in various contexts recalled over the past seven days and relative validity against total sitting time assessed by activPAL™ within participant in paid work (n=410) and not in paid work (n=284)

| Context                         | Overall (weekend and weekdays)                          |                    | Weekdays                                                |                     | Weekend Days                                            |                     |
|---------------------------------|---------------------------------------------------------|--------------------|---------------------------------------------------------|---------------------|---------------------------------------------------------|---------------------|
|                                 | Median (25 <sup>th</sup> , 75 <sup>th</sup> percentile) | ρ (95% CI)         | Median (25 <sup>th</sup> , 75 <sup>th</sup> percentile) | ρ (95% CI)          | Median (25 <sup>th</sup> , 75 <sup>th</sup> percentile) | ρ (95% CI)          |
| <b>Workers (n=410)</b>          |                                                         |                    |                                                         |                     |                                                         |                     |
| Work sitting, h/day             | 2.29 (0.57, 4.29)                                       | 0.43 (0.35, 0.50)  | 3.00 (0.60, 6.00)                                       | 0.51 (0.42, 0.57)   | 0.00 (0.00, 0.00)                                       | 0.11 (0.01, 0.20)   |
| Transport sitting, h/day        | 0.71 (0.38, 1.14)                                       | 0.07 (-0.03, 0.16) | 0.70 (0.33, 1.18)                                       | 0.11 (0.01, 0.21)   | 0.50 (0.17, 1.00)                                       | -0.03 (-0.12, 0.07) |
| TV sitting, h/day               | 1.43 (0.71, 2.14)                                       | 0.09 (-0.01, 0.18) | 1.20 (0.60, 2.00)                                       | 0.02 (-0.08, 0.12)  | 1.50 (0.75, 2.50)                                       | 0.18 (0.08, 0.27)   |
| Computer sitting, h/day         | 0.36 (0.07, 0.86)                                       | 0.12 (0.02, 0.22)  | 0.40 (0.05, 1.00)                                       | 0.10 (-0.00, 0.19)  | 0.25 (0.00, 1.00)                                       | 0.13 (0.04, 0.23)   |
| “Other” sitting, h/day          | 1.29 (0.79, 2.00)                                       | 0.04 (-0.06, 0.14) | 1.00 (0.06, 2.00)                                       | -0.04 (-0.13, 0.06) | 1.50 (1.00, 2.50)                                       | 0.09 (-0.01, 0.18)  |
| <b>Not in paid work (n=284)</b> |                                                         |                    |                                                         |                     |                                                         |                     |
| Transport sitting, h/day        | 0.57 (0.29, 1.00)                                       | 0.07 (-0.05, 0.19) | 0.60 (0.30, 1.00)                                       | 0.13 (0.02, 0.24)   | 0.50 (0.00, 1.00)                                       | -0.03 (-0.14, 0.09) |
| TV sitting, h/day               | 2.00 (1.00, 3.00)                                       | 0.31 (0.20, 0.41)* | 2.00 (1.00, 3.00)                                       | 0.26 (0.15, 0.37)*  | 2.00 (1.00, 3.00)                                       | 0.26 (0.15, 0.37)   |
| Computer, h/day                 | 0.43 (0.00, 1.00)                                       | 0.15 (0.03, 0.26)  | 0.40 (0.00, 1.00)                                       | 0.16 (0.05, 0.27)   | 0.25 (0.00, 1.00)                                       | 0.05 (-0.06, 0.17)  |
| “Other” sitting, h/day          | 1.29 (0.79, 2.00)                                       | 0.10 (-0.02, 0.21) | 1.60 (1.00, 2.80)                                       | 0.07 (-0.05, 0.18)  | 1.50 (1.00, 2.50)                                       | 0.11 (-0.01, 0.22)  |

\* significantly different to association in workers (p for interaction <0.05).
